# Supplementary material
Source: publisher figshare collection journal article supplement (https://gsajournals.figshare.com/ndownloader/files/14332814)
Supplement: Supplementary file 1 [file 14332814]

## Sheet: Table S3
Table S3: Complete table of significant SNPs detected in the study. In the manuscript, we have only displayed common QTL in Table 2, which is the truncated version of this table.
SNP	Chromosome	Position (Mbp)	Major Allele	Minor Allele	MAF	Seed Length		Seed Width		TKW		Yield		Spike Length		Spike Weight		Number of Spikelets			QTL common between traits
						-log(p)	R2	-log(p)	R2	-log(p)	R2	-log(p)	R2	-log(p)	R2	-log(p)	R2	-log(p)	R2
S01_29528910	1	29.5289	T	G	0.0818815	3.1658	2.40074	-	-	-	-	-	-	-	-	-	-	-	-		SNP	Chromosome	Position (Mbp)	Major Allele	Minor Allele	MAF	Seed Length		Seed Width		TKW		Yield		Spike Length		Spike Weight		No. of Spikelets
S01_425640986	1	425.641	T	C	0.125436	-	-	-	-	-	-	4.07299	3.51775	-	-	-	-	-	-								-log(p)	R2	-log(p)	R2	-log(p)	R2	-log(p)	R2	-log(p)	R2	-log(p)	R2	-log(p)	R2
S01_440284589	1	440.285	A	G	0.0660932	-	-	7.97336	6.88873	-	-	-	-	-	-	-	-	-	-		S04_220130053	4	220.13	G	A	0.195122	3.37568	2.59078	-	-	3.3511	2.39972	-	-	-	-	-	-	-	-
S01_441127557	1	441.128	A	G	0.0775877	-	-	4.36809	3.46142	-	-	-	-	-	-	-	-	-	-		S05_366528709	5	366.529	G	C	0.419861	5.21714	4.30246	-	-	3.35037	2.3991	-	-	-	-	-	-	-	-
S01_448040019	1	448.04	G	A	0.108014	3.0187	2.26833	-	-	-	-	-	-	-	-	-	-	-	-		S06_30049280	6	30.0493	T	C	0.188153	-	-	-	-	3.1405	2.2217	3.07757	2.56782	-	-	-	-	-	-
S02_21200739	2	21.2007	A	G	0.16899	-	-	10.3818	9.2795	-	-	-	-	-	-	-	-	-	-		S06_373070997	6	373.071	A	C	0.216028	-	-	-	-	-	-	3.32352	2.76971	-	-	3.13533	2.57911	-	-
S02_86294469	2	86.2945	A	G	0.329268	3.19228	2.42465	-	-	-	-	-	-	-	-	-	-	-	-		S06_568793265	6	568.793	G	A	0.447735	-	-	4.89971	3.95343	4.42777	3.32616	-	-	-	-	-	-	-	-
S02_110750907	2	110.751	G	A	0.296167	3.62442	2.81755	-	-	-	-	-	-	-	-	-	-	-	-		S11_161626009	11	161.626	C	T	0.155052	3.10817	2.34879	-	-	3.65329	2.65714	-	-	-	-	-	-	-	-
S02_120531680	2	120.532	T	G	0.148084	5.28333	4.36523	-	-	-	-	-	-	-	-	-	-	-	-		S11_241092955	11	241.093	G	A	0.465157	-	-	-	-	3.74355	2.73445	3.29939	3.77682	-	-	-	-	-	-
S02_132955695	2	132.956	T	C	0.205575	-	-	-	-	-	-	3.20556	2.65342	-	-	-	-	-	-		S11_59775443	11	59.7754	G	A	0.256098	3.41559	2.62705	-	-	3.57346	2.58892	-	-	-	-	-	-	-	-
S02_143430838	2	143.431	A	C	0.109756	-	-	-	-	3.84252	2.81943	-	-	-	-	-	-	-	-		S13_134782913	13	134.783	A	G	0.10453	3.26589	2.49121	-	-	3.80838	2.79009	-	-	-	-	-	-	-	-
S02_163841443	2	163.841	C	A	0.175958	3.49088	2.6956	-	-	-	-	-	-	-	-	-	-	-	-		S13_252462690	13	252.463	T	G	0.336237	-	-	-	-	-	-	4.06487	3.50957	-	-	4.69513	4.14067	-	-
S02_280450209	2	280.45	C	G	0.182927	-	-	-	-	-	-	3.03395	2.48505	-	-	-	-	-	-		S15_600918584	15	600.919	C	G	0.414634	-	-	-	-	-	-	3.32271	2.79895	-	-	-	-	4.54893	3.87424
S02_327466245	2	327.466	C	T	0.0729899	-	-	-	-	-	-	-	-	3.04626	2.45454	-	-	-	-		S16_336657077	16	336.657	C	T	0.416376	3.21586	2.44596	-	-	3.15593	2.23471	-	-	-	-	-	-	-	-
S02_403257803	2	403.258	G	A	0.181185	-	-	-	-	-	-	-	-	-	-	-	-	3.554	2.90385		S17_108653775	17	108.654	A	T	0.182927	3.70002	2.88679	-	-	3.28757	2.3459	-	-	-	-	-	-	-	-
S03_58073504	3	58.0735	C	T	0.320557	-	-	-	-	3.27026	2.33125	-	-	-	-	-	-	-	-		S18_426508862	18	426.509	A	G	0.0821854	3.52078	2.72287	-	-	3.06189	2.15557	-	-	-	-	-	-	-	-
S03_290939373	3	290.939	G	A	0.172474	-	-	-	-	-	-	3.36133	2.80708	-	-	-	-	-	-		S18_545444320	18	545.444	T	A	0.050001	-	-	-	-	3.00641	2.0253	-	-	3.35297	2.75113	-	-	-	-
S03_337625064	3	337.625	C	T	0.308362	-	-	-	-	3.65012	2.65442	-	-	-	-	-	-	-	-		S18_75576716	18	75.5767	C	G	0.175958	3.36066	2.57714	-	-	4.0607	3.00752	-	-	-	-	-	-	-	-
S03_354805182	3	354.805	T	C	0.202091	-	-	-	-	3.27515	2.33538	-	-	-	-	-	-	-	-		S20_603356555	20	603.357	G	C	0.210801	4.51359	3.64018	-	-	3.24984	2.31398	-	-	-	-	-	-	-	-
S03_407190205	3	407.19	T	A	0.19338	3.50394	2.70751	-	-	-	-	-	-	-	-	-	-	-	-		S21_411630228	21	411.63	C	T	0.132404	3.43143	2.64146	-	-	3.67174	2.67292	-	-	-	-	-	-	-	-
S03_431611782	3	431.612	A	G	0.182927	-	-	-	-	-	-	-	-	3.5049	2.89908	-	-	-	-		S21_90762051	21	90.7621	A	G	0.130662	5.85151	4.9071	-	-	3.65329	2.65714	-	-	-	-	-	-	-	-
S03_477602723	3	477.603	T	A	0.0683921	-	-	-	-	-	-	3.31809	2.76435	-	-	-	-	-	-
S04_5654320	4	5.65432	C	T	0.329268	-	-	-	-	4.25135	3.17268	-	-	-	-	-	-	-	-
S04_31032972	4	31.033	A	G	0.121951	-	-	-	-	-	-	-	-	-	-	-	-	3.3034	2.66339
S04_35525008	4	35.525	G	A	0.162021	3.3477	2.56537	-	-	-	-	-	-	-	-	-	-	-	-
S04_48117627	4	48.1176	C	T	0.337979	-	-	-	-	-	-	-	-	-	-	3.40835	2.84776	-	-
S04_99870528	4	99.8705	G	A	0.179443	-	-	-	-	3.94072	2.90395	-	-	-	-	-	-	-	-
S04_103131373	4	103.131	A	C	0.182927	3.38887	2.60276	-	-	-	-	-	-	-	-	-	-	-	-
S04_119394068	4	119.394	G	C	0.205575	3.7729	2.95367	-	-	-	-	-	-	-	-	-	-	-	-
S04_137847829	4	137.848	G	C	0.181185	-	-	-	-	-	-	-	-	-	-	-	-	3.01674	2.39061
S04_199697392	4	199.697	C	T	0.179443	-	-	-	-	3.72382	2.71753	-	-	-	-	-	-	-	-
S04_220130053	4	220.13	G	A	0.195122	3.37568	2.59078	-	-	3.3511	2.39972	-	-	-	-	-	-	-	-
S04_239757520	4	239.758	G	A	0.200348	4.91471	3.90549	-	-	-	-	-	-	-	-	-	-	-	-
S04_261858888	4	261.859	T	C	0.189895	-	-	-	-	3.82815	2.80708	-	-	-	-	-	-	-	-
S05_57840749	5	57.8407	C	T	0.207317	-	-	6.89552	5.84349	-	-	-	-	-	-	-	-	-	-
S05_366528709	5	366.529	G	C	0.419861	5.21714	4.30246	-	-	3.35037	2.3991	-	-	-	-	-	-	-	-
S05_397289341	5	397.289	T	C	0.158537	-	-	-	-	3.29252	2.35009	-	-	-	-	-	-	-	-
S06_27073124	6	27.0731	C	A	0.165505	4.64626	3.76435	-	-	-	-	-	-	-	-	-	-	-	-
S06_30049280	6	30.0493	T	C	0.188153	-	-	-	-	3.1405	2.2217	3.07757	2.56782	-	-	-	-	-	-
S06_166357566	6	166.358	G	A	0.191638	-	-	-	-	3.17402	2.24996	-	-	-	-	-	-	-	-
S06_347530512	6	347.531	A	G	0.207317	3.53683	2.73751	-	-	-	-	-	-	-	-	-	-	-	-
S06_373070997	6	373.071	A	C	0.216028	-	-	-	-	-	-	3.32352	2.76971	-	-	3.13533	2.57911	-	-
S06_480699953	6	480.7	G	T	0.114983	-	-	-	-	4.09538	3.03751	-	-	-	-	-	-	-	-
S06_510179340	6	510.179	C	T	0.425087	3.8272	3.00358	-	-	-	-	-	-	-	-	-	-	-	-
S06_518578819	6	518.579	T	A	0.428571	3.08027	2.32367	-	-	-	-	-	-	-	-	-	-	-	-
S06_568793265	6	568.793	G	A	0.447735	-	-	4.89971	3.95343	4.42777	3.32616	-	-	-	-	-	-	-	-
S07_12079084	7	12.0791	C	T	0.19338	-	-	4.18929	3.29721	-	-	-	-	-	-	-	-	-	-
S07_91555077	7	91.5551	A	G	0.123693	-	-	-	-	3.33642	2.38727	-	-	-	-	-	-	-	-
S07_103055343	7	103.055	G	A	0.135889	-	-	-	-	-	-	-	-	4.67174	4.05498	-	-	-	-
S07_156597465	7	156.597	A	G	0.109756	-	-	3.10557	2.31768	-	-	-	-	-	-	-	-	-	-
S07_226848353	7	226.848	G	C	0.146341	-	-	-	-	-	-	-	-	-	-	-	-	3.48957	2.84187
S07_516499740	7	516.5	C	G	0.385017	-	-	3.21508	2.41527	-	-	-	-	-	-	-	-	-	-
S08_67484386	8	67.4844	C	T	0.155052	-	-	-	-	-	-	-	-	3.02092	2.43018	-	-	-	-
S08_121556108	8	121.556	G	T	0.189895	-	-	-	-	5.5367	4.3036	-	-	-	-	-	-	-	-
S08_197291732	8	197.292	A	G	0.141115	-	-	-	-	-	-	-	-	-	-	-	-	3.03369	2.40667
S08_324506204	8	324.506	A	C	0.165505	4.55965	3.68325	-	-	-	-	-	-	-	-	-	-	-	-
S08_425968180	8	425.968	G	C	0.419861	-	-	3.14191	2.35002	-	-	-	-	-	-	-	-	-	-
S09_61869885	9	61.8699	G	A	0.184669	-	-	-	-	3.23805	2.30401	-	-	-	-	-	-	-	-
S09_315677404	9	315.677	G	C	0.160279	-	-	-	-	-	-	-	-	-	-	-	-	3.91112	3.24946
S09_385133100	9	385.133	C	A	0.186411	-	-	3.46479	2.63906	-	-	-	-	-	-	-	-	-	-
S09_415851589	9	415.852	G	A	0.167247	-	-	-	-	-	-	3.13867	2.58768	-	-	-	-	-	-
S10_10944243	10	10.9442	G	A	0.137631	-	-	4.81025	3.87027	-	-	-	-	-	-	-	-	-	-
S10_62112342	10	62.1123	G	A	0.240418	-	-	-	-	4.54765	3.43079	-	-	-	-	-	-	-	-
S10_120456859	10	120.457	T	C	0.114983	3.65715	2.8475	-	-	-	-	-	-	-	-	-	-	-	-
S10_447491711	10	447.492	A	G	0.181185	-	-	-	-	-	-	-	-	3.22685	2.62882	-	-	-	-
S10_459839942	10	459.84	G	A	0.116725	-	-	-	-	-	-	-	-	3.11666	2.52236	-	-	-	-
S10_463199055	10	463.199	C	T	0.118467	-	-	5.076	4.11775	-	-	-	-	-	-	-	-	-	-
S11_6019252	11	6.01925	G	T	0.400697	3.13119	2.36953	-	-	-	-	-	-	-	-	-	-	-	-
S11_52972239	11	52.9722	G	A	0.210801	-	-	-	-	4.23671	3.15997	-	-	-	-	-	-	-	-
S11_59775443	11	59.7754	G	A	0.256098	3.41559	2.62705	-	-	3.57346	2.58892	-	-	-	-	-	-	-	-
S11_161626009	11	161.626	C	T	0.155052	3.10817	2.34879	-	-	3.65329	2.65714	-	-	-	-	-	-	-	-
S11_191637589	11	191.638	G	A	0.189895	-	-	4.03088	3.15228	-	-	-	-	-	-	-	-	-	-
S11_211702566	11	211.703	C	T	0.160279	-	-	-	-	-	-	-	-	-	-	-	-	3.38896	2.74528
S11_227848416	11	227.848	C	T	0.0683921	-	-	3.06151	2.27851	-	-	-	-	-	-	-	-	-	-
S11_235603452	11	235.603	C	T	0.367596	3.04283	2.29001	-	-	-	-	-	-	-	-	-	-	-	-
S11_241092955	11	241.093	G	A	0.465157	-	-	-	-	3.74355	2.73445	3.29939	3.77682	-	-	-	-	-	-
S12_25712846	12	25.7128	C	T	0.297909	-	-	-	-	-	-	-	-	-	-	-	-	3.66238	3.00839
S12_87898328	12	87.8983	G	A	0.151568	-	-	-	-	3.02799	2.12711	-	-	-	-	-	-	-	-
S13_9159276	13	9.15928	G	A	0.174216	-	-	11.8982	10.8217	-	-	-	-	-	-	-	-	-	-
S13_9595560	13	9.59556	C	G	0.12892	-	-	3.21068	2.41133	-	-	-	-	-	-	-	-	-	-
S13_17051098	13	17.0511	A	C	0.097561	-	-	-	-	3.12941	2.21236	-	-	-	-	-	-	-	-
S13_29748874	13	29.7489	G	A	0.158537	3.53461	2.73548	-	-	-	-	-	-	-	-	-	-	-	-
S13_51976779	13	51.9768	T	C	0.398955	-	-	5.52574	4.5394	-	-	-	-	-	-	-	-	-	-
S13_58962015	13	58.962	C	T	0.146341	-	-	-	-	-	-	3.25129	2.69845	-	-	-	-	-	-
S13_134782913	13	134.783	A	G	0.10453	3.26589	2.49121	-	-	3.80838	2.79009	-	-	-	-	-	-	-	-
S13_135391210	13	135.391	G	A	0.148084	-	-	-	-	3.04866	2.14446	-	-	-	-	-	-	-	-
S13_209539816	13	209.54	C	A	0.179443	-	-	-	-	3.22339	2.29163	-	-	-	-	-	-	-	-
S13_222536639	13	222.537	T	C	0.118467	-	-	-	-	3.1171	2.202	-	-	-	-	-	-	-	-
S13_245158348	13	245.158	T	A	0.0695415	-	-	-	-	3.60266	2.61385	-	-	-	-	-	-	-	-
S13_248290754	13	248.291	G	A	0.327526	4.07767	3.23469	-	-	-	-	-	-	-	-	-	-	-	-
S13_252462690	13	252.463	T	G	0.336237	-	-	-	-	-	-	4.06487	3.50957	-	-	4.69513	4.14067	-	-
S13_265039502	13	265.04	T	A	0.139373	-	-	-	-	-	-	-	-	3.55707	2.95004	-	-	-	-
S13_273891126	13	273.891	G	A	0.0844843	3.1063	2.3471	-	-	-	-	-	-	-	-	-	-	-	-
S14_76804610	14	76.8046	G	A	0.344948	-	-	-	-	-	-	-	-	3.23877	2.64035	-	-	-	-
S14_159035766	14	159.036	A	G	0.12892	-	-	3.39627	2.57749	-	-	-	-	-	-	-	-	-	-
S14_224203729	14	224.204	C	T	0.203833	-	-	-	-	-	-	3.36337	2.80909	-	-	-	-	-	-
S14_234445278	14	234.445	T	C	0.385017	3.31881	2.53916	-	-	-	-	-	-	-	-	-	-	-	-
S14_326710436	14	326.71	G	T	0.263066	-	-	-	-	3.66098	2.66372	-	-	-	-	-	-	-	-
S14_496475519	14	496.476	G	T	0.205575	-	-	5.13998	4.17752	-	-	-	-	-	-	-	-	-	-
S15_349866048	15	349.866	A	G	0.195122	-	-	-	-	-	-	-	-	-	-	-	-	4.35995	3.68818
S15_374356928	15	374.357	A	C	0.214286	-	-	3.95759	3.08541	-	-	-	-	-	-	-	-	-	-
S15_387961489	15	387.961	G	A	0.165505	-	-	7.12279	6.06255	-	-	-	-	-	-	-	-	-	-
S15_412358042	15	412.358	G	A	0.358885	-	-	-	-	3.91159	2.87886	-	-	-	-	-	-	-	-
S15_566727557	15	566.728	C	G	0.170732	-	-	-	-	3.26639	2.32798	-	-	-	-	-	-	-	-
S15_582877307	15	582.877	C	G	0.0867832	-	-	5.87425	4.86845	-	-	-	-	-	-	-	-	-	-
S15_600918584	15	600.919	C	G	0.414634	-	-	-	-	-	-	3.32271	2.79895	-	-	-	-	4.54893	3.87424
S16_31792648	16	31.7926	G	T	0.186411	-	-	-	-	3.06748	2.16027	-	-	-	-	-	-	-	-
S16_229832414	16	229.832	A	G	0.12892	3.11853	2.35812	-	-	-	-	-	-	-	-	-	-	-	-
S16_242132329	16	242.132	G	A	0.372822	-	-	-	-	-	-	-	-	-	-	-	-	3.23734	2.6003
S16_263001852	16	263.002	C	G	0.191638	-	-	-	-	5.67482	4.42676	-	-	-	-	-	-	-	-
S16_296781475	16	296.781	G	A	0.198606	-	-	-	-	-	-	-	-	-	-	-	-	3.32948	2.68833
S16_336657077	16	336.657	C	T	0.416376	3.21586	2.44596	-	-	3.15593	2.23471	-	-	-	-	-	-	-	-
S16_336657091	16	336.657	G	A	0.364111	3.05461	2.3006	-	-	-	-	-	-	-	-	-	-	-	-
S16_399342247	16	399.342	C	T	0.172474	-	-	3.87433	3.0096	-	-	-	-	-	-	-	-	-	-
S17_108653775	17	108.654	A	T	0.182927	3.70002	2.88679	-	-	3.28757	2.3459	-	-	-	-	-	-	-	-
S17_108653809	17	108.654	C	T	0.182927	3.70965	2.89562	-	-	-	-	-	-	-	-	-	-	-	-
S17_239233309	17	239.233	A	G	0.191638	-	-	-	-	3.146	2.22634	-	-	-	-	-	-	-	-
S17_286648169	17	286.648	A	C	0.203833	3.6121	2.80627	-	-	-	-	-	-	-	-	-	-	-	-
S18_31933921	18	31.9339	G	A	0.148084	3.31892	2.53926	-	-	-	-	-	-	-	-	-	-	-	-
S18_62374700	18	62.3747	G	A	0.221254	-	-	-	-	3.3453	2.3948	-	-	-	-	-	-	-	-
S18_75576716	18	75.5767	C	G	0.175958	3.36066	2.57714	-	-	4.0607	3.00752	-	-	-	-	-	-	-	-
S18_112460873	18	112.461	C	A	0.12892	-	-	-	-	3.0807	2.17138	-	-	-	-	-	-	-	-
S18_182594987	18	182.595	C	A	0.167247	-	-	-	-	-	-	-	-	-	-	-	-	3.63979	2.98658
S18_412960071	18	412.96	A	G	0.19338	-	-	-	-	4.24545	3.16756	-	-	-	-	-	-	-	-
S18_426508862	18	426.509	A	G	0.0821854	3.52078	2.72287	-	-	3.06189	2.15557	-	-	-	-	-	-	-	-
S18_482517030	18	482.517	T	A	0.125436	-	-	-	-	3.26721	2.32866	-	-	-	-	-	-	-	-
S18_545444320	18	545.444	T	A	0.050001	-	-	-	-	3.00641	2.0253	-	-	3.35297	2.75113	-	-	-	-
S19_70012848	19	70.0128	G	C	0.127178	-	-	-	-	-	-	-	-	-	-	-	-	3.59822	2.94647
S19_124074654	19	124.075	A	T	0.0923345	-	-	-	-	3.43788	2.47341	-	-	-	-	-	-	-	-
S19_543224680	19	543.225	C	T	0.172474	-	-	-	-	-	-	-	-	4.71666	4.1001	-	-	-	-
S19_551502245	19	551.502	A	G	0.135889	-	-	3.02372	2.24497	-	-	-	-	-	-	-	-	-	-
S19_634869001	19	634.869	C	T	0.348432	-	-	-	-	-	-	-	-	3.59677	2.98887	-	-	-	-
S19_677800667	19	677.801	T	A	0.158537	-	-	-	-	3.75132	2.74111	-	-	-	-	-	-	-	-
S19_692361944	19	692.362	G	A	0.174216	-	-	3.11901	2.32963	-	-	-	-	-	-	-	-	-	-
S19_736363601	19	736.364	C	T	0.47561	-	-	-	-	-	-	-	-	-	-	-	-	3.02858	2.40183
S20_35656076	20	35.6561	C	G	0.372822	-	-	-	-	3.02165	2.12179	-	-	-	-	-	-	-	-
S20_89189834	20	89.1898	C	T	0.184669	-	-	6.81949	5.77037	-	-	-	-	-	-	-	-	-	-
S20_148333930	20	148.334	G	A	0.186411	3.10629	2.3471	-	-	-	-	-	-	-	-	-	-	-	-
S20_158929692	20	158.93	T	C	0.181185	-	-	5.91696	4.90892	-	-	-	-	-	-	-	-	-	-
S20_339143703	20	339.144	G	A	0.200348	3.17021	2.40472	-	-	-	-	-	-	-	-	-	-	-	-
S20_404723936	20	404.724	C	A	0.195122	-	-	8.82198	7.72266	-	-	-	-	-	-	-	-	-	-
S20_405356717	20	405.357	A	G	0.439024	-	-	-	-	3.1273	2.21059	-	-	-	-	-	-	-	-
S20_488953056	20	488.953	G	A	0.158537	-	-	-	-	-	-	-	-	-	-	-	-	3.25297	2.61521
S20_580880025	20	580.88	T	C	0.184669	-	-	-	-	-	-	3.00914	2.46079	-	-	-	-	-	-
S20_603356555	20	603.357	G	C	0.210801	4.51359	3.64018	-	-	3.24984	2.31398	-	-	-	-	-	-	-	-
S21_66129792	21	66.1298	A	G	0.0716762	3.04824	2.29487	-	-	-	-	-	-	-	-	-	-	-	-
S21_86037764	21	86.0378	A	C	0.209059	-	-	-	-	3.56226	2.57936	-	-	-	-	-	-	-	-
S21_90650201	21	90.6502	C	G	0.404181	4.30358	3.44434	-	-	-	-	-	-	-	-	-	-	-	-
S21_90762051	21	90.7621	A	G	0.130662	5.85151	4.9071	-	-	3.65329	2.65714	-	-	-	-	-	-	-	-
S21_118538093	21	118.538	A	T	0.134146	3.20618	2.43721	-	-	-	-	-	-	-	-	-	-	-	-
S21_187878445	21	187.878	G	A	0.1777	-	-	3.34578	2.53219	-	-	-	-	-	-	-	-	-	-
S21_202424506	21	202.425	G	A	0.184669	-	-	4.26398	3.36573	-	-	-	-	-	-	-	-	-	-
S21_411630228	21	411.63	C	T	0.132404	3.43143	2.64146	-	-	3.67174	2.67292	-	-	-	-	-	-	-	-
S21_440793454	21	440.793	T	G	0.165505	-	-	-	-	-	-	-	-	-	-	-	-	3.07174	2.44274
